# Supplementary material for: SIRT3 inhibits cardiac hypertrophy by regulating PARP-1 activity
Source: Aging (Albany NY). 2020 Mar 4;12(5):4178–92. doi: 10.18632/aging.102862 (PMC7093179; doi:10.18632/aging.102862)
Supplement: Supplementary Figures [file aging-12-102862-s002..pdf]

## SUPPLEMENTARY FIGURES

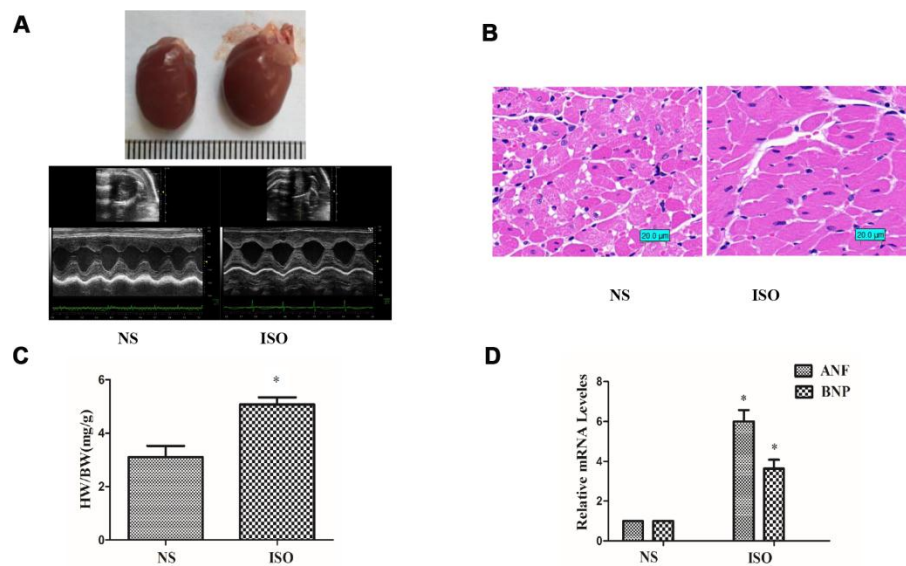

**Supplementary Figure 1.** SD rats were subjected to subcutaneous injections of 1.5 mg/kg/d isoproterenol for 7 d. (A and B) Pathological changes were observed with echocardiography and a light microscope at 400×magnification after H&E staining. (C and D) The ratios of the heart weight to body weight (HW/BW) and mRNA expression of ANF and BNP were calculated. Data were presented as means±SE. \* $P < 0.05$  vs. NS,  $n = 6$  (independent experiments).

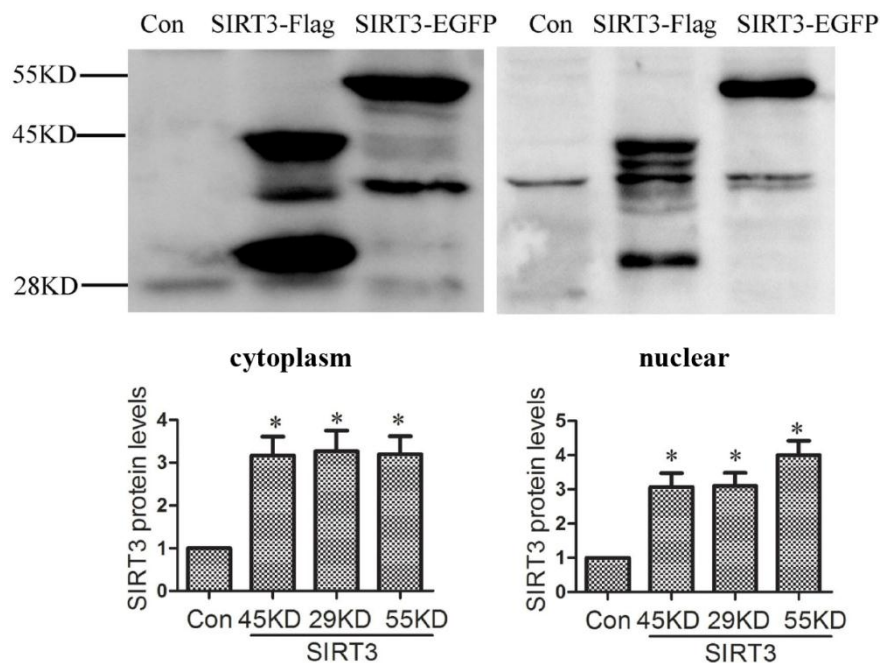

**Supplementary Figure 2.** The distribution of SIRT3 overexpression in primary neonatal rat cardiomyocytes. Cells were transfected with plasmids for SIRT3-Flag or SIRT3-EGFP. The protein expression levels of SIRT3 in cytoplasm and nuclear were measured by Western blot. Data were presented as means±SE. \* $P < 0.05$  vs. Con group,  $n = 3$ .
